# Supplementary material
Source: Research Square preprint supplement (doi:10.21203/rs.3.rs-9429913/v1)
Supplement: Supplementary file 1 [file ea393abc52f004284d3e858f.xlsx]

## Sheet: Table 1
Table 1. Comparison between the composition of ASTIMEX reference standards and the results obtained through the EDS. 1 – ASTIMEX standard, 2 – analyses accomplished with the EDS; 3 – difference between oxide content in standard and the one dosed by EDS.
	Biotite			Diopside			Kaersutite			Sanidine
	1	2	3	1	2	3	1	2	3	1	2	3
SiO2	38.72	39.05	0.33	55.13	55.36	0.23	40.09	40.12	0.03	64.67	64.58	0.09
TiO2	1.77	1.54	0.23	0.05	0.14	0.09	5.04	5.61	0.57
Cr2O3				0.58	0.54	0.04
Al2O3	15.30	15.27	0.03				12.36	13.07	0.71	18.76	18.92	0.16
FeO	10.72	9.53	1.19	1.21	1.32	0.11	12.23	11.36	0.87	0.18	0.34	0.16
MnO	0.04	0.13	0.09				0.18	0.16	0.02
MgO	19.52	20.34	0.82	17.46	17.90	0.44	12.55	12.95	0.40
CaO	0.10	0.10	0.00	25.55	24.82	0.73	11.56	11.32	0.24
BaO										1.09	1.26	0.17
Na2O							2.44	2.51	0.07	3.01	2.90	0.11
K2O	9.91	10.05	0.14				1.19	0.96	0.23	12.11	12.14	0.03
Total	96.08	96.01		99.98	100.08		97.62	98.06		98.82	100.14

## Sheet: Table 2
Table2. Representative analyses of feldspar crystals from the fine-grained leucogranite facies of the SBS.
Sample	GSB-10	GSB-10	GSB-10	GSB-10	GSB-10	GSB-10	GSB-10	GSB-10	GSB-10	GSB-10	GSB-11	GSB-11	GSB-11	GSB-11	GSB-16	GSB-16	GSB-16	GSB-16	GSB-26	GSB-26	GSB-20	GSB-20	GSB-20	GSB-20	GSB-20	GSB-20	GSB-20	GSB-20	GSB-20	GSB-20	GSB-20	GSB-20
Analysis	1	2	3	4	5	6	7	8	9	10	11	12	13	14	15	16	17	18	19	20	21	22	23	24	25	26	27	28	29	30	31	32
Observation																Exsolution	Exsolution	Exsolution	Exsolution		Exsolution	Exsolution	Exsolution		Exsolution
SiO2	63.76	63.14	63.62	63.57	64.54	63.88	62.86	63.17	65.26	65.29	64.47	64.27	64.11	64.57	63.9	65.97	65.97	63.07	67.11	66.22	64.52	64.36	67.88	65.23	67.64	65.25	64.07	64.99	65.67	65.23	64.47	64.62
TiO2				0.04	0.1		0.07			0.05	0.02	0.05	0.01	0.03					0.07				0.02			0.03			0.05	0.03		0.15
Al2O3	19.12	19.03	19.11	21.57	21.36	21.21	18.85	19.07	21.81	21.7	19.27	19.03	19.24	18.98	21.71	19.88	19.88	18.96	20.59	20.89	18.93	18.92	20.22	22.08	19.95	21.96	19.61	21.87	21.49	21.89	19.09	18.97
FeO	0.08	0.01	0.11		0.12	0.09	0.13	0.02	0.03	0.04		0.06		0.04	0.02	0.04	0.04			0.03	0.04				0.06				0.02
MnO	0.07		0.01		0.01		0.01	0.05	0.04				0.03	0.03		0.05	0.05		0.03							0.03			0.13	0.01	0.02	0.06
MgO		0.04	0.03			0.03	0.09						0.04	0.05				0.67
CaO	0.03	0.07		1.83	1.59	1.78	0	0.07	1.39	1.82	0.15	0.08	0.07		2.05	0.13	0.13		0.69	1.31		0.02	0.28	2.26	0.38	2.4	0.04	2.05	1.64	2.25	0.17	0.03
Na2O	1.37	1.28	0.83	10.98	10.57	10.83	0.97	0.63	10.82	10.71	1.12	0.71	0.74	0.57	10.32	11.65	11.65		11.42	11.15	0.32	0.34	11.5	10.12	11.66	10.23	0.74	10.81	10.91	10.3	1.12	0.78
K2O	14.49	14.65	15.03	0.21	0.24	0.14	15.03	15.91	0.21	0.16	14.98	15.31	15.21	15.38	0.3	0.14	0.14	15.66	0.02	0.17	15.87	16.23	0.1	0.29	0.1	0.11	15.45	0.15	0.04	0.27	15.02	15.39
BaO	0.34	0.05				0.39	0.12	0.02				0.1	0.15		0.14			0.32			0.1	0.07			0.01			0.07		0.02
Rb2O	0.62	1.66	1.07	1.75	1.4	1.36	1.7	1.02	0.45	0.2		0.29	0.15	0.15	1.43	2.15	2.15	1.15		0.23	0.04						0.09				0.1
Cs2O	0.03	0.04	0.18	0.03		0.13	0.18	0.01				0.1	0.15		0.14			0.17			0.18	0.05
SrO
Total	99.91	99.97	99.99	99.98	99.93	99.84	100.01	99.97	100.01	99.97	100.01	100.00	99.9	99.8	100.01	100.01	100.01	100.00	99.93	100.00	100.00	99.99	100.00	99.98	99.8	100.01	100.00	99.94	99.95	100.00	99.99	100.00
Calculation based on 8 oxygens and 5 cations
Si	2.95885	2.95022	2.96002	2.84676	2.87389	2.86307	2.94837	2.95039	2.8781	2.87693	2.96686	2.97197	2.96516	2.98098	2.85366	2.94216	2.94216	2.94755	2.94055	2.91405	2.98248	2.97771	2.96658	2.86858	2.96696	2.86882	2.95502	2.86541	2.88823	2.87052	2.97117	2.97686
Al	1.04583	1.04806	1.048	1.13853	1.12109	1.12048	1.04212	1.04983	1.13374	1.12704	1.04525	1.03723	1.04888	1.03281	1.14277	1.04504	1.04504	1.04442	1.0634	1.08354	1.03141	1.03178	1.04158	1.1445	1.03145	1.13803	1.06606	1.13655	1.11403	1.13542	1.03699	1.03005
Ti				0.00134714	0.00334886		0.00246923			0.00165694	0.00069219	0.00173885	0.000347839	0.00104161					0.00230672				0.000657354			0.000991973			0.00165383	0.000992866		0.00519683
Fe	0.00310484	0.000390773	0.00428025		0.00446887	0.00337353	0.00509949	0.000781221	0.00110651	0.00147407		0.0023204		0.00154441	0.000746977	0.00149195	0.00149195			0.00110409	0.00154639				0.00220108				0.000735647
Mn	0.00275159		0.000394105		0.000377183		0.000397301	0.00197811	0.00149427				0.00117532	0.00117317		0.00188886	0.00188886		0.00111346							0.00111726			0.00484305	0.000372756	0.000780749	0.00234128
Mg		0.00278611	0.00208071			0.00200437	0.00629274						0.00275786	0.00344102				0.046677
Sr
Ca	0.00149173	0.00350463	0	0.0878099	0.0758635	0.0854832	0	0.00350317	0.0656851	0.0859306	0.00739648	0.00396388	0.00346908		0.0980957	0.00621236	0.00621236		0.0323955	0.0617693		0.000991497	0.0131119	0.106493	0.0178602	0.113065	0.00197679	0.0968476	0.0772863	0.106094	0.00839486	0.00148084
Na	0.123275	0.115969	0.0748789	0.953413	0.912635	0.941186	0.0882187	0.0570545	0.925265	0.915066	0.0999398	0.0636613	0.0663643	0.0510251	0.893639	1.00746	1.00746		0.970259	0.9514	0.0286823	0.0305019	0.974523	0.862939	0.991718	0.872126	0.0661788	0.924159	0.9304	0.878884	0.100085	0.0696734
K	0.857693	0.873124	0.891967	0.0119952	0.0136314	0.00800357	0.8992	0.947824	0.0118132	0.00899273	0.879307	0.903027	0.897306	0.905678	0.0170888	0.00796409	0.00796409	0.933512	0.00111779	0.00954213	0.935726	0.9578	0.00557446	0.0162669	0.00559497	0.00616886	0.908916	0.0084357	0.00224395	0.0151554	0.882936	0.904314
Ba	0.00618221	0.000915397				0.00684891	0.00220536	0.000366006				0.00181187	0.00271834		0.00244974			0.00585975			0.00181123	0.00126898			0.00017187			0.00120929		0.000344853
Rb	0.0184972	0.0498651	0.0320055	0.050382	0.0400783	0.0391872	0.0512621	0.0306272	0.0127588	0.00566567		0.00862132	0.00446018	0.00445204	0.041056	0.0616449	0.0616449	0.0345522		0.00650691	0.00118873						0.00266863				0.00296285
Cs	0.000593704	0.000797047	0.00357148	0.000572919		0.00248476	0.00360043	0.000199179				0.00197202	0.00295861		0.00266627			0.00338815			0.00354838	0.000986532
Total	5.01827	5.04563	5.01719	5.09081	5.04539	5.07212	5.04924	5.04255	5.02995	5.02276	4.99945	4.99632	4.9956	4.98215	5.05218	5.07386	5.07386	5.01596	5.01114	5.02791	4.98639	5.00104	5.00202	4.99878	5.01596	5.00032	5.00083	5.03261	5.01942	5.00779	5.00332	4.98991
Or	86.7547	87.8825	92.2553	1.13891	1.36025	0.768449	90.8628	93.9605	1.17806	0.890378	89.1211	92.8597	92.5193	94.6666	1.68983	0.779546	0.779546	99.3762	0.111359	0.933023	96.844	96.6925	0.561257	1.6503	0.551042	0.622262	93.0245	0.818482	0.222189	1.51481	89.0581	92.7056
Ab	12.4691	11.6726	7.74466	90.5238	91.0695	90.3664	8.91436	5.65597	92.2715	90.6016	10.1293	6.54639	6.84269	5.33343	88.3677	98.6124	98.6124	0	96.6613	93.0272	2.9685	3.07925	98.1186	87.5459	97.673	87.9727	6.77317	89.6675	92.1252	87.8464	10.0952	7.14256
An	0.150887	0.352751	0	8.33729	7.57023	8.20753	0	0.347279	6.55041	8.50807	0.749661	0.407612	0.35769	0	9.70021	0.608082	0.608082	0	3.22737	6.03976	0	0.100094	1.32016	10.8038	1.75903	11.405	0.202318	9.39673	7.65264	10.6043	0.846754	0.151808
Cs	0.625323	0.0921374	0	0	0	0.657586	0.222848	0.0362832	0	0	0	0.186317	0.280282	0	0.242243	0	0	0.623795	0	0	0.187455	0.128107	0	0	0.0169272	0	0	0.117332	0	0.0344688	0	0
K/Rb	23.371	8.8253	14.0467	0.12	0.171429	0.102941	8.84118	15.598	0.466667	0.8	-	52.7931	101.4	102.533	0.20979	0.0651163	0.0651163	13.6174	-	0.73913	396.75	-	-	-	-	-	171.667	-	-	-	150.2	-
Rb (ppm)	6200	16600	10700	17500	14000	13600	17000	10200	4500	2000	0	2900	1500	1500	14300	21500	21500	11500	0	2300	400	0	0	0	0	0	900	0	0	0	1000	0

## Sheet: Table 3
Table 3. Representative analyses of muscovite crystals from the fine-grained leucogranite facies of the SBS.
Sample	GSB-10	GSB-10	GSB-10	GSB-10	GSB-10	GSB-11	GSB-11	GSB-16	GSB-16	GSB-20	GSB-20	GSB-20	GSB-20	GSB-20	GSB-20	GSB-20	GSB-26	GSB-26	GSB-26	GSB-26	GSB-26
Analysis	1	2	3	4	5	6	7	8	9	10	11	12	13	14	15	16	17	18	19	20	21
Observation
SiO2	45.6046	46.0696	45.6187	45.696	46.29	45.5354	46.3915	44.5474	45.7806	45.7747	46.055	46.214	45.6497	46.0032	46.1546	46.1664	45.6855	45.6777	45.8642	45.7559	45.589
Al2O3	37.4437	37.2149	37.4379	37.44	37.8894	37.4833	36.6254	36.8247	36.6437	36.7678	36.9017	36.4297	36.4986	36.5088	36.4277	36.5472	37.1765	36.946	37.3115	37.289	37.3856
K2O	10.2442	10.3721	10.4181	10.416	9.06533	10.0122	10.1214	10.454	10.261	10.2661	10.2579	10.1492	10.2373	10.416	10.1017	10.176	10.3625	10.1452	10.1942	10.2641	9.94197
Rb2O						0.0672605		1.18293	0.413131					0.0768			0.134454	0.346189	0.0863914		0.422654
Na2O	0.79688	0.451381	0.844969	0.72	0.655093	0.951256	0.63379	0.673212	0.413131	0.788225	0.710755	0.768154	0.836287	0.7488	0.69203	0.8352	0.643457	0.778924	0.729527	0.913004	0.806884
FeO	1.24812	1.35414	1.14263	1.296	1.6859	1.29717	1.43083	1.53877	1.68135	1.67257	1.35428	1.57471	1.51877	1.3824	1.51862	1.488	1.4886	1.4136	1.34387	1.32626	1.40244
MgO	0.230423	0.364946	0.336067	0.3168	0.269744	0.365129	0.355307	0.490483	0.345877	0.365275	0.384192	0.393679	0.509462	0.4512	0.432519	0.4224	0.326531	0.355805	0.29757	0.317149	0.240144
BaO						0.05		0.288519	0.0768615	0.144187	0.0096048	0.0576115	0.374887	0.0288	0.144173		0.0672269	0.0769308			0.04
TiO2	0.220822	0.134454	0.20164	0.03	0.067436	0.05	0.278484		0.220977	0.144187	0.326563	0.288058	0.2307	0.2688	0.355627	0.2304	0.0768307	0.182711	0.105589	0.0768846	0.105663
CaO		0.01			0.04				0.115292			0.0864173			0.0576692	0.0672		0.04	0.04	0.01	0.0672403
ZnO	0.09			0.04		0.172956
MnO	0.0672067	0.03		0.04	0.02	0.02			0.05	0.057675		0.03	0.096125	0.03	0.01
Cr2O3	0.0576058			0.01	0.0192674		0.115235					0.01		0.0864	0.105727	0.0672	0.04	0.04	0.03	0.05
F					0.33
Cl
Li2O*					0.09
H2O*	4.54561	4.54958	4.54276	4.54223	4.44288	4.54093	4.55701	4.47137	4.52156	4.52917	4.54638	4.54037	4.52026	4.53908	4.54599	4.5461	4.53542	4.53059	4.54679	4.54531	4.5335
Subtotal	100.549	100.551	100.543	100.547	100.865	100.546	100.509	100.471	100.524	100.51	100.546	100.542	100.472	100.54	100.546	100.546	100.537	100.534	100.55	100.548	100.535
F=Cl=O					0.138947
Total	100.549	100.551	100.543	100.547	100.726	100.546	100.509	100.471	100.524	100.51	100.546	100.542	100.472	100.54	100.546	100.546	100.537	100.534	100.55	100.548	100.535
Calculation based on 22 oxygens and 14 cations
Si	6.01693	6.07298	6.02257	6.03348	6.03602	6.01398	6.10544	5.97503	6.07228	6.06129	6.07533	6.10437	6.05667	6.07825	6.08898	6.09039	6.04115	6.04654	6.04961	6.0373	6.03093
AlIV	1.98307	1.92702	1.97743	1.96652	1.96398	1.98602	1.89456	2.02497	1.92772	1.93871	1.92467	1.89563	1.94333	1.92175	1.91102	1.90961	1.95885	1.95346	1.95039	1.9627	1.96907
[Z]	8	8	8	8	8	8	8	8	8	8	8	8	8	8	8	8	8	8	8	8	8
AlVI	3.83898	3.85439	3.84736	3.85928	3.85854	3.84819	3.786	3.7959	3.80024	3.79898	3.81212	3.77528	3.7636	3.7631	3.75257	3.77242	3.83463	3.81024	3.84958	3.83567	3.85948
Ti	0.021913	0.0133307	0.020022	0.00286005	0.00661374	0.00477241	0.0275658		0.0220449	0.0143601	0.0324005	0.0286179	0.0230216	0.0267123	0.0352871	0.0228609	0.00764132	0.0181911	0.0104753	0.00763003	0.0105134
Fe	0.137698	0.149264	0.126138	0.143086	0.183822	0.143256	0.15746	0.172582	0.186479	0.185194	0.149384	0.173929	0.168497	0.152731	0.167526	0.164144	0.164597	0.156471	0.148222	0.146328	0.155136
Zn	0.00841659			0.00518935		0.0233798
Mn	0.00750962	0.00321656		0.00429398	0.00212778	0.00214953			0.00539632	0.00646793		0.00322244	0.0108012	0.00322272	0.00107389
Cr	0.0175626			0.00292899	0.00580555		0.0350444					0.00293077		0.0263792	0.0322308	0.0204854	0.0117382	0.011766	0.00877726	0.0146511
Mg	0.0453229	0.07172	0.0661439	0.0623591	0.0524373	0.0718926	0.0697119	0.0980769	0.0683937	0.0721081	0.0755555	0.0775236	0.10077	0.0888761	0.0850667	0.0830746	0.064371	0.0702166	0.0585151	0.0623854	0.0473611
Li					0.0474391
[Y]	4.0774	4.09192	4.05966	4.08	4.15678	4.09364	4.07578	4.06656	4.08255	4.07711	4.06945	4.0615	4.06669	4.06102	4.07375	4.06299	4.08298	4.06688	4.07557	4.06666	4.07249
Ca		0.00135629			0.00538318		0.00135395		0.0163829	0.00272727		0.012229	0.00683162		0.00815071	0.00949753		0.00545501	0.00542579	0.00135852	0.00952965
Na	0.20383	0.115355	0.216266	0.184302	0.165605	0.243567	0.161708	0.175057	0.106235	0.202347	0.18177	0.196709	0.215109	0.191807	0.176996	0.213608	0.164957	0.199897	0.186553	0.233548	0.20694
K	1.72407	1.74407	1.75443	1.75428	1.50784	1.68676	1.69914	1.78859	1.73608	1.73403	1.72608	1.71005	1.73257	1.7555	1.69994	1.7124	1.7479	1.71307	1.7152	1.72753	1.67767
Rb						0.00570994	0.00324936	0.101985	0.0352221					0.00652243			0.011428	0.029456	0.00732456		0.0359391
Ba						0.00248627		0.0151634	0.00399468	0.00748117	0.00049646	0.0029818	0.0194894	0.00149103	0.00745275		0.00348327	0.00399031			0.00199168
[X]	1.9279	1.86078	1.97069	1.93859	1.67883	1.93852	1.86545	2.08079	1.89791	1.94658	1.90835	1.92197	1.974	1.95532	1.89254	1.93551	1.92777	1.95187	1.9145	1.96243	1.93207
F					0.136067
Cl
OH	4	4	4	4	3.86393	4	4	4	4	4	4	4	4	4	4	4	4	4	4	4	4
[W]	4	4	4	4	4	4	4	4	4	4	4	4	4	4	4	4	4	4	4	4	4
Total	18.0053	17.9527	18.0304	18.0186	17.8356	18.0322	17.9412	18.1473	17.9805	18.0237	17.9778	17.9835	18.0407	18.0163	17.9663	17.9985	18.0107	18.0187	17.9901	18.0291	18.0046
Mg-Li	0.0453229	0.07172	0.0661439	0.0623591	0.00499813	0.0718926	0.0697119	0.0980769	0.0683937	0.0721081	0.0755555	0.0775236	0.10077	0.0888761	0.0850667	0.0830746	0.064371	0.0702166	0.0585151	0.0623854	0.0473611
Fe+Mg+Ti-AlVl	-3.67186	-3.68858	-3.7012	-3.70904	-3.66598	-3.69801	-3.60098	-3.62332	-3.58632	-3.59296	-3.63033	-3.56951	-3.56128	-3.58043	-3.54868	-3.58542	-3.66239	-3.63557	-3.69089	-3.68171	-3.69383
Ti	8.084	6.65182	6.62035	1.14622	2.94394	1.49029	10.6437		11.2089	4.97208	11.1832	9.44953	6.793	8.68989	11.8672	7.15424	3.22461	6.30967	4.09921	2.51349	3.97008
Mg	16.7203	35.7873	21.8707	24.9915	23.3411	22.4501	26.9172	35.9081	34.7753	24.9668	26.0783	25.598	29.7344	28.9126	28.6083	25.9979	27.1643	24.355	22.8983	20.551	17.8846
Na	75.1957	57.5608	71.509	73.8623	73.715	76.0596	62.439	64.0919	54.0158	70.0611	62.7385	64.9525	63.4726	62.3975	59.5245	66.8479	69.6111	69.3353	73.0025	76.9355	78.1453
K/Rb						148.857	263.5	8.8374	24.8372					135.625			77.0714	29.3056	118		23.5227
Rb						700	400	12300	4300					800			1400	3600	900		4400
* Calculated by stoichiometry Li2O and H2O calculations after Tindle and Webb (1990) European Journal of Mineralogy, vol. 2, pgs. 595-610.
TINDLE, A. G.; WEBB, P. C. Estimation of lithium contents in trioctahedral micas using microprobe data; application to micas from granitic rocks. European Journal of Mineralogy, v. 2, n. 5, p. 595-610, 1990.

## Sheet: Table 4
Table 4. Representative analyses of garnet crystals from the fine-grained leucogranite facies of the SBS.
Sample	GSB-10	GSB-10	GSB-10	GSB-10	GSB-10	GSB-10	GSB-10	GSB-10	GSB-10	GSB-10	GSB-10	GSB-10	GSB-10	GSB-10	GSB-11	GSB-26	GSB-26	GSB-26	GSB-26	GSB-26	GSB-26	GSB-26	GSB-26	GSB-26
Analysis	3	4	5	6	7	8	9	10	11	12	13	14	26	27	14	2	3	4	5	6	7	8	9	10
Observation	core	core	core	core	intermediary	intermediary	intermediary	intermediary	rim	rim	rim	rim	core	rim	rim	core	core	intermediary	intermediary	intermediary	rim	rim	rim	rim
SiO2	36.46	35.9	36.26	35.91	36.4	35.94	35.82	35.67	35.64	35.24	35.97	35.53	36.44	36.87	35.82	36.2	36.5	36.58	36.38	36.66	36.09	36.27	36.51	36.49
TiO2		0.04					0.08				0.04		0.07						0.01	0.03
Al2O3	21.41	21.52	21.65	21.44	21.44	21.39	21.26	21.16	21.24	21.29	21.08	21.69	22.2	21.5	21.28	21.59	21.5	21.39	21.33	21.45	21.48	21.45	21.44	21.32
Cr2O3	0.02		0.01	0.05	0.01		0.01		0.02						0.02		0.09			0.08
FeO	34.26	34.67	34.51	34.91	34.77	35.02	34.92	35.32	35.13	35.43	34.98	34.7	33.65	33.52	35.69	35.05	34.8	34.8	35.41	35	35.18	34.98	34.8	34.1
MnO	5.83	5.76	5.76	5.87	5.65	5.73	6	5.99	6.07	6.15	6.21	6.3	6.1	6.77	5.52	5.67	5.68	5.52	5.5	5.37	5.81	5.95	6	7.1
MgO	1.46	1.58	1.4	1.4	1.33	1.54	1.48	1.56	1.48	1.58	1.42	1.44	1.29	1.13	1.22	1.22	1.24	1.34	1.17	1.11	1.21	1.02	1.02	0.77
CaO	0.51	0.39	0.4	0.31	0.24	0.29	0.18	0.25	0.32	0.27	0.24	0.28	0.17	0.17	0.32	0.22	0.19	0.21	0.17	0.24	0.18	0.21	0.18	0.21
Total	99.95	99.86	99.99	99.89	99.84	99.91	99.75	99.95	99.9	99.96	99.94	99.94	99.92	99.96	99.87	99.95	100	99.84	99.97	99.94	99.95	99.88	99.95	99.99
Calculation based on 12 oxygens and 8 cations
Si	2.97568	2.93244	2.95883	2.9373	2.97813	2.93699	2.9352	2.9174	2.91659	2.88217	2.94439	2.90351	2.97257	3.01464	2.93607	2.96072	2.98336	2.99252	2.97818	3.00011	2.95384	2.97329	2.99027	2.9934
Ti		0.00245767					0.00493096				0.00246289		0.00429518						0.000615768	0.00184669	0	0	0	0
Al	2.05941	2.07172	2.08212	2.06687	2.06739	2.06011	2.0532	2.03969	2.04856	2.05218	2.03367	2.08903	2.13433	2.07184	2.05574	2.08112	2.07112	2.06234	2.05795	2.06884	2.072	2.07239	2.06956	2.06127
Cr	0.00129055	0	0.00064516	0.00323354	0.000646869		0.000647868		0.00129403						0.00129612		0.00581607			0.00517618
Fe3+*		0.0584884		0.0552902		0.0659179	0.0659002	0.125521	0.116967	0.183486	0.0726232	0.10395			0.0708346						0.0203302
Fe2+*	2.33837	2.30985	2.35545	2.33274	2.37904	2.32738	2.3271	2.29032	2.28724	2.23983	2.32196	2.2675	2.29559	2.29204	2.37565	2.39735	2.37874	2.38083	2.42421	2.39535	2.38764	2.39809	2.3836	2.33938
Mn	0.403017	0.398512	0.398107	0.406683	0.391539	0.39661	0.416436	0.414958	0.420738	0.426033	0.430558	0.436068	0.421472	0.468852	0.383234	0.392786	0.393229	0.382488	0.38136	0.372223	0.402773	0.413134	0.416231	0.493327
Mg	0.177636	0.192398	0.170306	0.170714	0.162219	0.187609	0.180793	0.190207	0.180554	0.192641	0.173281	0.175428	0.156874	0.137737	0.149076	0.14875	0.151092	0.16342	0.142785	0.135418	0.147636	0.124652	0.124539	0.0941652
Ca	0.0445978	0.0341328	0.0349724	0.0271686	0.021039	0.0253919	0.0158036	0.0219081	0.0280583	0.0236603	0.0210494	0.0245166	0.0148585	0.0148931	0.0281037	0.019279	0.0166394	0.0184071	0.0149111	0.021044	0.015785	0.0184451	0.0157959	0.018458
Total	8	8	8	8	8	8	8	8	8	8	8	8	8	8	8	8	8	8	8	8	8	8	8	8
End-members
Almandine	78.9025	78.7031	79.6073	79.4176	80.5407	79.2437	79.1495	78.5057	78.4217	77.7135	78.7947	78.0951	79.4653	78.6691	80.9127	81.0418	80.9178	80.8391	81.8087	81.9193	80.8319	81.1723	81.0702	79.4268
Spessartine	13.5988	13.5784	13.4549	13.8455	13.2553	13.504	14.1639	14.2236	14.4257	14.7817	14.6108	15.0186	14.5899	16.0923	13.0526	13.278	13.3765	12.9871	12.8696	12.7298	13.6356	13.9841	14.1567	16.7494
Pyrope	5.99389	6.55552	5.75584	5.81194	5.4918	6.3878	6.14916	6.51974	6.1906	6.6839	5.88022	6.04193	5.43044	4.72749	5.07742	5.02844	5.13971	5.54881	4.8185	4.6312	4.99812	4.2193	4.2358	3.1971
Grossular	1.5039	1.13107	1.18185	0.899483	0.712038	0.83775	0.520641	0.707414	0.909517	0.753546	0.689672	0.804352	0.51435	0.511171	0.924742	0.65172	0.56444	0.624998	0.503199	0.717896	0.529198	0.624345	0.537244	0.626685
Andradite		0.031932		0.0240618		0.0268057	0.0167107	0.0435339	0.0519311	0.0673747	0.0246284	0.0400247			0.0318638						0.00519243
Uvarovite
Prp+Grs+Adr	7.49779	7.71852	6.93744	6.73549	6.20384	7.25235	6.68651	7.27068	7.15205	7.50482	6.59452	6.88631	5.94479	5.23866	6.03402	5.68016	5.70415	6.17381	5.3217	5.3491	5.53251	4.84365	4.77304	3.82378
Alm	78.9025	78.7031	79.6073	79.4176	80.5407	79.2437	79.1495	78.5057	78.4217	77.7135	78.7947	78.0951	79.4653	78.6691	80.9127	81.0418	80.9178	80.8391	81.8087	81.9193	80.8319	81.1723	81.0702	79.4268
Sps	13.5988	13.5784	13.4549	13.8455	13.2553	13.504	14.1639	14.2236	14.4257	14.7817	14.6108	15.0186	14.5899	16.0923	13.0526	13.278	13.3765	12.9871	12.8696	12.7298	13.6356	13.9841	14.1567	16.7494
Fe/Mn	5.80216	5.94295	5.91553	5.87195	6.07613	6.03438	5.74637	5.8219	5.71426	5.6881	5.56159	5.43826	5.44661	4.88862	6.38379	6.10346	6.04925	6.22459	6.35673	6.43524	5.97848	5.80462	5.72663	4.74206
FeO/MnO	5.8765	6.0191	5.99132	5.94719	6.15398	6.11169	5.82	5.89649	5.78748	5.76098	5.63285	5.50794	5.51639	4.95126	6.46558	6.18166	6.12676	6.30435	6.43818	6.51769	6.05508	5.87899	5.8	4.80282
MnO	5.83	5.76	5.76	5.87	5.65	5.73	6	5.99	6.07	6.15	6.21	6.3	6.1	6.77	5.52	5.67	5.68	5.52	5.5	5.37	5.81	5.95	6	7.1
* Calculated by Droop 1984 method
DROOP, G. T. R. A general equation for estimating Fe3+ concentrations in ferromagnesian silicates and oxides from microprobe analyses, using stoichiometric criteria. Mineralogical magazine, v. 51, n. 361, p. 431-435, 1987.

## Sheet: Table 5
Table 5. Representative analyses of zircon crystals from the fine-grained leucogranite facies of the SBS.
Sample	GSB-16	GSB-16	GSB-16	GSB-16	GSB-16
Analysis	1	2	3	4	5
Observation
SiO2	32.45	33.32	32.79	32.3	30.41
P2O5	2.97	1.55
ZrO2	60.16	62	63.71	62.01	60.5
HfO2	3.26	3.12	3.43	4.95	5.1
ThO2	0.34		0.06
UO2	0.57			0.73	2.51
PbO	0.12
FeO					1.4
Y2O3	0.14
Lu2O3				0.01	0.08
Total	100.01	99.99	99.99	100	100
Calculation based on 4 oxygens and 2 cations
Si	0.981501	1.0086	1.01144	1.00774	0.972843
P	0.0760202	0.0397046
Zr	0.886985	0.914823	0.957944	0.943058	0.943439
Hf	0.0281366	0.0269492	0.0301907	0.0440685	0.0465559
Th	0.00233934		0.000421008
U	0.00383492			0.00506609	0.017861
Pb	0.000976698
Fe					0.0374437
Y	0.00225274
Lu				9.41783e-05	0.000772543
Total	1.98205	1.99007	2	2.00002	2.01892
Zr/Hf	31.5242	33.9462	31.7298	21.3998	20.2646
HfO2	3.26	3.12	3.43	4.95	5.1

## Sheet: Table 6
table 6. Representative analyses of columbite crystals from the fine-grained leucogranite facies of the SBS.
Sample	GSB-10	GSB-10	GSB-10	GSB-10	GSB-11
Analysis	1	2	3	4	5
Observation
Nb2O5	66.82	67.09	66.7	63.81	70.48
Ta2O5	10.79	10.22	9.79	12.05	6.33
TiO2	0.69	0.73	0.56	0.74	0.51
Al2O3			0.04	0.17	0.01
SiO2			1.56	1.75	1.13
HfO2					0.23
ThO2		0.07
UO2		0.2		0.02
PbO	0.93	1.37	0.91	1.26	1.21
FeO	18.84	18.66	18.38	18.14	18.36
MnO	1.56	1.62	1.45	1.18	1.3
MgO			0.42	0.45	0.43
ZnO
Cr2O3				0.15
CaO			0.03	0.02
Na2O	0.36		0.16	0.22
K2O				0.05
Total	99.99	99.99	100	100.01	99.99
Calculation based on 6 oxygens and 3 cations
Nb	1.83194	1.81382	1.79529	1.57198	1.8769
Ta	0.168735	0.157604	0.150304	0.169326	0.0961521
Ti	0.027692	0.0288909	0.0220646	0.0266865	0.0198814
Al			0.0024691	0.0096046	0.000610728
Si			0.0817241	0.0839102	0.0585696
Hf					0.00340173
Th		0.000837899
U		0.00234094		0.00021331
Pb	0.0133539	0.019399	0.0128283	0.0162574	0.0168765
Fe	0.840482	0.820903	0.805001	0.727175	0.795594
Mn	0.0704839	0.0721794	0.0643186	0.0479073	0.0570533
Mg			0.0327919	0.0321573	0.0332165
Zn
Cr				0.43197
Ca			0.0016834	0.00102718
Na	0.0372296		0.0162446	0.0204439
K				0.14399
Cátions totais	2.98991	3.01079	2.98471	3.28265	2.95826
Ta/(Ta+Nb)	0.084339	0.0799441	0.0772535	0.0972409	0.0487326
Mn/(Mn+Fe)	0.0773728	0.0808205	0.0739874	0.0618093	0.0669131
Nb/Ta	10.8569	11.5087	11.9444	9.28373	19.5202
Ta2O5	10.79	10.22	9.79	12.05	6.33

## Sheet: Table 7
Table 7. Representative analyses of monazite crystals from the fine-grained leucogranite facies of the SBS.
Sample	GSB-16	GSB-16	GSB-16	GSB-16	GSB-26	GSB-26	GSB-26
Analysis	1	2	3	4	5	6	7
Observation
P2O5	28.62	28.97	28.56	28.38	25.72	28.91	27.65
SiO2			1.29	1
TiO2					0.19		0.02
CaO	1.42	1.79	2.14	1.76	1.37	1.51	1.38
FeO					0.06
MnO					0.35
Cr2O3					0.17
La2O3	8.32	8.01	7.57	7.42	8.25	7.62	7.72
Ce2O3	26.35	25.38	23.36	23.71	23.57	22.87	24.79
Pr2O3	4.73	4.44	3.58	3.21	3.72	3.36	4.25
Nd2O3	12.16	11.24	11.1	12.1	11.47	11.62	12.45
Sm2O3	4.08	5.18	4.74	4.82	4.41	4.02	4.23
Gd2O3	2.66	2.31	2.58	2.65	2.84	2.19	2.56
Dy2O3	0.83	1.57	0.96		1.37	0.65	1.25
Ho2O3							0.05
Er2O3					0.63		0.02
Yb2O3					0.44	0.29
Lu2O3					0.42		0.17
Y2O3	2.67			2.95	2.02	3.15	2.73
ThO2	8.17	9.78	12.3	12.66	11.61	12.07	9.44
UO2		1.33	1.81	0.34	0.98	1.61	1.3
PbO					0.41	0.12
Total	100.01	100	99.99	101	100	99.99	100.01
Calculation based on 4 oxygens and 2 cations
P	0.969663	0.984208	0.959097	0.94787	0.917699	0.978884	0.954133
S			0.0511708	0.0394516
Ti					0.00602338		0.000613198
Ca	0.060887	0.0769621	0.0909502	0.0743934	0.0618636	0.0647061	0.0602668
Fe					0.00211477
Mn					0.0124943
Cr					0.00566476
La	0.122809	0.118557	0.110753	0.107968	0.128244	0.112407	0.116061
Ce	0.386066	0.372872	0.33924	0.34245	0.363679	0.334872	0.36993
Pr	0.0689703	0.0649189	0.0517413	0.0461415	0.0571245	0.0489635	0.0631179
Nd	0.173799	0.161089	0.157249	0.170484	0.172645	0.165978	0.181236
Sm	0.0562672	0.0716328	0.0647928	0.0655281	0.0640489	0.0554055	0.0594153
Gd	0.0352895	0.03073	0.0339263	0.0346573	0.039679	0.0290362	0.0345913
Dy	0.0107014	0.0202978	0.0122684		0.0186021	0.00837545	0.0164148
Ho							0.000648146
Er					0.00834135		0.0002561
Yb					0.00565481	0.00353685
Lu					0.0053455		0.00209253
Y	0.056864			0.0619347	0.045306	0.0670454	0.0592177
Th	0.0744041	0.0893102	0.111028	0.113656	0.111349	0.109854	0.0875608
U		0.011876	0.0159758	0.00298467	0.00919043	0.0143281	0.0117906
Pb					0.00465167	0.00129199
Total	2.01572	2.00245	1.99819	2.00752	2.03972	1.99468	2.01735
ΣETR+Y	61.8	58.13	53.89	56.86	59.14	55.77	60.22
Y+ETRp/(Y+ETRP+ETRL)	0.0824765	0.0275138	0.0182769	0.0849609	0.103423	0.10653	0.0971963
As/(As+P)
ThSiO4	21.9683	27.8157	34.4924	32.1974	31.2097	31.6881	25.5411
CePO4	70.8524	72.1843	65.5076	60.3001	63.3602	60.042	67.0725
YPO4	7.17935			7.50254	5.43011	8.26989	7.38636

## Sheet: Table 8
Table 8. Representative analyses of xenotime crystals from the fine-grained leucogranite facies of the SBS.
Sample	GSB-11	GSB-11	GSB-16	GSB-16	GSB-16	GSB-16	GSB-16	GSB-16	GSB-16	GSB-20
Analysis	1	2	3	4	5	6	7	8	9	10
Observation
P2O5	33.24	33.02	32.95	34.27	34.98	34.4	34.22	32.76	34.13	33.93
CaO	0.13	0.19								0.08
Na2O	0.14	0.16
K2O	0.02	0.12
FeO	0.1
MnO	0.02	0.01
MgO	0.03	0.13
La2O3	0.05		0.16	0.05	0.1		0.07		0.25
Ce2O3	0.17		0.11		0.23	0.14	0.31		0.27
Pr2O3	0.42
Nd2O3	0.78	0.6	0.29		0.26	0.3	0.27	0.3	0.01	0.38
Sm2O3	1.44	1.18	1.2	1.27		1.15	0.86	1.21	0.89	1.11
Gd2O3	3.51	3.3	2.98	3.38	2.8	3.5	3.03	3.3	3.81	3.02
Dy2O3	5.37	5.63	5.92	6.65	6.63	6.44	5.76	5.95	6.33	5.8
Ho2O3			1.32							1.4
Er2O3	3.37	3.61	3.81	3.4	3.25	3.39	3.75	3.93	3.86	4.42
Yb2O3	5.51	5.12	5.63	4.12	3.6	3.05	4.98	4.9	3.08	5.54
Lu2O3	0.74	0.81	1.54	0.24	0.85	0.22	0.65	0.58	0.68	1.26
Y2O3	40.49	40.77	42.7	44.02	45.45	44.89	41.92	42.59	44.15	42.76
ThO2	1.47	1.03	0.26		0.74	0.53	0.63	1.1	0.66	0.08
UO2	2.99	3.85	1.13	1.92	0.64	1.45	3.27	3.08	1.12	0.14
PbO		0.48		0.7	0.47	0.55	0.29	0.31	0.78	0.12
Total	99.99	100.01	100	100.02	100	100.01	100.01	100.01	100.02	100.04
Calculation based on 4 oxygens and 2 cations
P	0.975393	0.97163	0.966823	0.984419	0.990895	0.983446	0.989286	0.965121	0.981723	0.981211
Ca	0.00482778	0.00707559								0.00292788
Na	0.00940852	0.0107825
K	0.000884372	0.00532097
Fe	0.00289869
Mn	0.000587168	0.0002944
Mg	0.00155016	0.00673602
La	0.000639211		0.00204535	0.000625736	0.00123414		0.000881648		0.00313291
Ce	0.00215723		0.00139577		0.00281751	0.00173081	0.00387555		0.0033585
Pr	0.00530418
Nd	0.00965551	0.00744795	0.00358964		0.00310701	0.00361806	0.00329281	0.00372838	0.000121343	0.00463579
Sm	0.0171999	0.0141335	0.0143323	0.0148496		0.0133824	0.0101201	0.01451	0.0104205	0.0130661
Gd	0.040331	0.0380234	0.034239	0.0380185	0.0310584	0.0391808	0.0343002	0.0380684	0.0429132	0.0341978
Dy	0.059966	0.063044	0.0661036	0.0726941	0.0714715	0.0700632	0.0633689	0.0667063	0.0692896	0.0638291
Ho			0.0145497							0.0152088
Er	0.0366957	0.0394183	0.0414842	0.0362419	0.0341631	0.0359632	0.040229	0.0429632	0.0412009	0.0474316
Yb	0.058238	0.0542663	0.0595026	0.0426284	0.0367322	0.0314071	0.051857	0.051996	0.0319109	0.0577065
Lu	0.00774569	0.00850194	0.0161184	0.00245916	0.00858887	0.00224349	0.00670293	0.00609502	0.00697704	0.0129975
Y	0.746865	0.754119	0.78758	0.794861	0.809314	0.80671	0.761796	0.788716	0.798287	0.777306
Th	0.0115947	0.00814676	0.00205064		0.0056346	0.00407279	0.0048956	0.00871073	0.00510294	0.00062186
U	0.0230606	0.0297759	0.00871466	0.014496	0.00476506	0.0108953	0.0248468	0.0238489	0.00846742	0.00106411
Pb		0.00449118		0.0063938	0.00423352	0.00499978	0.00266585	0.00290399	0.00713416	0.00110346
Total	2.015	2.02321	2.01853	2.00769	2.00401	2.00771	1.99812	2.01337	2.01004	2.01331
ΣETR+Y	61.85	61.02	65.66	63.13	63.17	63.08	61.6	62.76	63.33	65.69
Y+ETRp/(Y+ETRP+ETRL)	0.980851	0.991964	0.992915	0.999341	0.9926	0.99438	0.991363	0.996117	0.99307	0.995265
As/(As+P)
ThSiO4	3.4892	2.46411	0.603668		1.59414	1.1633	1.4699	2.51774	1.46406	0.186741
CePO4	0.403513		0.255398		0.495476	0.307287	0.723285		0.598935
YPO4	96.1073	97.5359	99.1409	100	97.9104	98.5294	97.8068	97.4823	97.937	99.8133

## Sheet: Table 9
Table 9. Chemical analyses of samples from the fine-grained leucogranite facies of the SBS.
Sample	GSB-16	GSB-26	GSB-11	GSB-10	GSB-20
SiO2	74.9	74.9	75.6468	75.7	76.1
Al2O3	15.3	14.65	14.2208	14.6	15.05
FeOt	1.4	1.16	0.95793	0.62	0.13
CaO	0.88	0.4	0.414774	0.46	1.18
MgO	0.08	0.07	0.0395023	0.06	0.05
Na2O	5.72	3.97	3.46632	2.97	5.85
K2O	1.54	3.42	4.24649	4.47	0.91
TiO2	0.02	0.02	0.0197511	0.02	0.02
MnO	0.21	0.14	0.0592534	0.07	0.02
P2O5	0.08	0.05	0.0395023	0.05	0.06
LOI	0.65	0.92	0.888801	1.1	0.93
Total	100.78	99.7	100	100.12	100.3
La	8.3	7.8	5.1	7.7	7.3
Ce	18.4	20.5	11.4	21.3	14.2
Pr	2.35	2.56	1.39	2.8	1.56
Nd	7.6	9.1	4.8	9.5	4.7
Sm	2.75	3.61	2.06	3.57	2.09
Eu	0.19	0.05	-	0.04	0.14
Gd	2.92	3.34	1.98	3.13	2.74
Tb	0.72	0.8	0.53	0.65	0.76
Dy	5.38	4.64	3.47	3.95	4.81
Ho	1.18	0.93	0.65	0.64	1.01
Er	4.37	2.92	2.12	1.97	3.13
Tm	0.87	0.52	0.45	0.39	0.57
Yb	7.97	4.37	3.07	3.1	4.26
Lu	1.28	0.67	0.5	0.45	0.67
Ba	87.3	46.7	25.2	86.2	74.9
Sr	36	8.2	4.1	11	25.5
Rb	62.7	208	198.5	182	32.2
Cs	1.49	1.53	2.47	2.26	0.94
Ga	24.6	29.9	28.5	26.1	22.4
Hf	1.39	2.35	2.1	2.09	4.11
Zr	23	33	33	35	75
Nb	14.6	64	65	61	8.84
Ta	1.7	8.1	5.6	8.2	0.9
Th	7.46	7.89	7.11	10.7	6.57
U	4.33	2.61	4.12	4.92	3.98
Pb	35	36	46	47	33
Y	35.5	29.4	19.4	20.3	30.6
Cr	9	25	-	9	12
Ni	2	3	1	2	5
Sn	1.5	5.4	5	2.9	1.3
Zn	31	34	38	17	38
V	-	5	-	-	-
W	1.2	3.4	4	3.1	2.1
Co	-	1	-	-	-
Cu	41	43	31	26	62
Li	30	20	30	10	30
Mo	-	-	-	-	1
Sc	15	6	7	5	2
K2O+Na2O	7.26	7.39	7.81	7.44	6.76
K2O/Na2O	0.27	0.86	1.23	1.51	0.16
Fe*	0.95	0.94	0.96	0.91	0.72
MALI	6.38	6.99	7.39	6.98	5.58
A/CNK	1.2	1.33	1.28	1.38	1.17
A	51.453	72.375	62.917	79.23	45.031
B	19.771	16.517	13.393	9.505	3.119
Eu/Eu*	0.21	0.04	-	0.04	0.18
CeN/YbN	0.59	1.19	0.94	1.75	0.85
K/Rb	407	136	179	203	469
K/Csx100	85	185	144	164	80
K/Ba	146	607	1416	430	100
Zr/Hf	16.5468	14.0426	15.7143	16.7464	18.2482
Nb/Ta	8.58824	7.90123	11.6071	7.43902	9.82222
Rb/Sr	1.74167	25.3659	48.4146	16.5455	1.26275
Rb/Ba	0.718213	4.45396	7.87698	2.11137	0.429907
